# Supplementary material for: Novel Perbutyrylated Glucose Derivatives of (–)-Epigallocatechin-3-Gallate Inhibit Cancer Cells Proliferation by Decreasing Phosphorylation of the EGFR: Synthesis, Cytotoxicity, and Molecular Docking
Source: MDPI journal article supplement (doi:10.3390/molecules26144361), 2021-07-19
Supplement: s1 [file s1]

## Supporting Information

### **Novel per-butyrylated glucoses derivatives of (-)-epigallocatechin-3-gallate inhibit cancer cells proliferation by decreasing phosphorylation of the EGFR: Synthesis, cytotoxicity and molecular docking**

**Ya Wang** <sup>1,2,a</sup>, **Xiao-Jing Shen** <sup>3,a</sup>, **Fa-Wu Su** <sup>4,a</sup>, **Yin-Rong Xie** <sup>1,2</sup>, **Li-Xia Wang** <sup>1,2</sup>, **Ning Zhang** <sup>1,2</sup>, **Yi-Long Wu** <sup>1,2</sup>, **Yun Niu** <sup>1,2</sup>, **Dong-Ying Zhang** <sup>1</sup>, **Cheng-Ting Zi** <sup>1,\*</sup>, **Xuan-Jun Wang** <sup>1,\*</sup>, **Jun Sheng** <sup>1,2,\*</sup>

<sup>1</sup> Key Laboratory of Pu-er Tea Science, Ministry of Education, College of Science, Yunnan Agricultural University, Kunming, 650201, China; wangya9188@126.com; xyr351527080@163.com; wanglixia0315@163.com; zn1193594574@163.com; ynau\_wuyl@126.com; Niuyun0429@163.com; 757664982@qq.com; zichengting@126.com; xuanjunwang@qq.com; shengj@ynau.edu.cn

<sup>2</sup> College of Food Science and Technology, Yunnan Agricultural University, Kunming, 650201, China; wangya9188@126.com; xyr351527080@163.com; wanglixia0315@163.com; zn1193594574@163.com; ynau\_wuyl@126.com; Niuyun0429@163.com; shengj@ynau.edu.cn

<sup>3</sup> Party Committee of Organ, Yunnan Agricultural University, Kunming, 650201, China; sxj243@sina.com

<sup>4</sup> State Key Laboratory for Conservation and Utilization of Bio-Resources in Yunnan, Yunnan Agricultural University, Kunming, 650201, China; su\_faw@126.com

<sup>a</sup> These authors contributed equally to this work

Table S1. The characteristic  $^1\text{H}$ -NMR and  $^{13}\text{C}$ -NMR of compounds **7–12**

Table S2. The energies of the binding between EGFR and compounds **4**, **11** and **12**

Figure S1. The details of the binding between EGFR and EGCG (**4**)

Figure S2.  $^1\text{H}$ -NMR spectra of compound **6**

Figure S3.  $^{13}\text{C}$ -NMR spectra of compound **6**

Figure S4.  $^1\text{H}$ -NMR spectra of compound **7**

Figure S5.  $^{13}\text{C}$ -NMR spectra of compound **7**

Figure S6. HMBC spectra of compound **7**

Figure S7.  $^1\text{H}$ -NMR spectra of compound **8**

Figure S8.  $^{13}\text{C}$ -NMR spectra of compound **8**

Figure S9. HMBC spectra of compound **8**

Figure S10.  $^1\text{H}$ -NMR spectra of compound **9**

Figure S11.  $^{13}\text{C}$ -NMR spectra of compound **9**

Figure S12.  $^1\text{H}$ -NMR spectra of compound **10**

Figure S13.  $^{13}\text{C}$ -NMR spectra of compound **10**

Figure S14.  $^1\text{H}$ -NMR spectra of compound **11**

Figure S15.  $^{13}\text{C}$ -NMR spectra of compound **11**

Figure S16.  $^1\text{H}$ -NMR spectra of compound **12**

Figure S17.  $^{13}\text{C}$ -NMR spectra of compound **12**

**Table S1.** The characteristic <sup>1</sup>H-NMR and <sup>13</sup>C-NMR of compounds **7–12**.

| Compounds | H-1'''         |                            | C-1''' $\delta$ (ppm) | H-1''''        |                              | C-1'''' $\delta$ (ppm) |
|-----------|----------------|----------------------------|-----------------------|----------------|------------------------------|------------------------|
|           | $\delta$ (ppm) | $J_{1'''-2'''}(\text{Hz})$ |                       | $\delta$ (ppm) | $J_{1''''-2''''}(\text{Hz})$ |                        |
| <b>7</b>  | —              | —                          | —                     | 4.9            | 9.0                          | 102.7                  |
| <b>8</b>  | 4.7            | 9.5                        | 107.0                 | 4.5            | 9.5                          | 107.3                  |
| <b>9</b>  | —              | —                          | —                     | 4.7            | 9.0                          | 108.2                  |
| <b>10</b> | 4.7            | 9.5                        | 107.0                 | 4.5            | 9.5                          | 107.8                  |
| <b>11</b> | —              | —                          | —                     | 4.9            | 9.0                          | 102.7                  |
| <b>12</b> | 4.7            | 9.5                        | 107.1                 | 4.6            | 9.5                          | 107.8                  |

**Table S2.** The energies of the binding between EGFR and compounds **4**, **11** and **12**.

| Compd.    | (vdW+Hbond+desolv)energy(kcal/mol) | Electrostatic energy (kcal/mol) | Total internal energy (kcal/mol) | The best docking energy (kcal/mol) | Inhibition constant (nM) |
|-----------|------------------------------------|---------------------------------|----------------------------------|------------------------------------|--------------------------|
| <b>4</b>  | −7.7                               | −1.1                            | −3.8                             | −5.0                               | 159.2                    |
| <b>11</b> | −8.1                               | −0.4                            | −10.9                            | 2.4                                | 1754.3                   |
| <b>12</b> | −8.4                               | −0.09                           | −10.4                            | 1.91                               | 455.5                    |

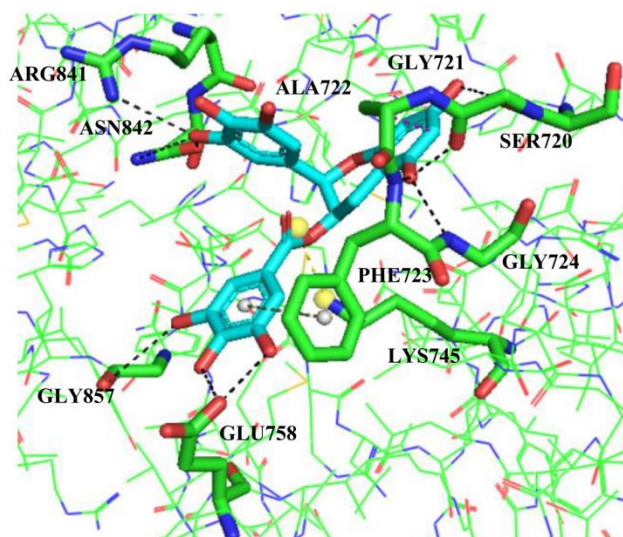

**Figure S1.** The details of the binding between EGFR and EGCG (**4**): the protein is shown as lines; ligand and the key residues are shown as sticks (ligand color: C cyan, N blue, O red and polar hydrogen); hydrogen bonds are shown as black dotted lines; hydrophobic interactions are shown as red dotted lines;  $\pi$ -stacking is shown as gray dotted lines; salt bridges were shown as yellow dotted lines.

Figure S2.  $^1\text{H}$ -NMR spectra of compound **6**

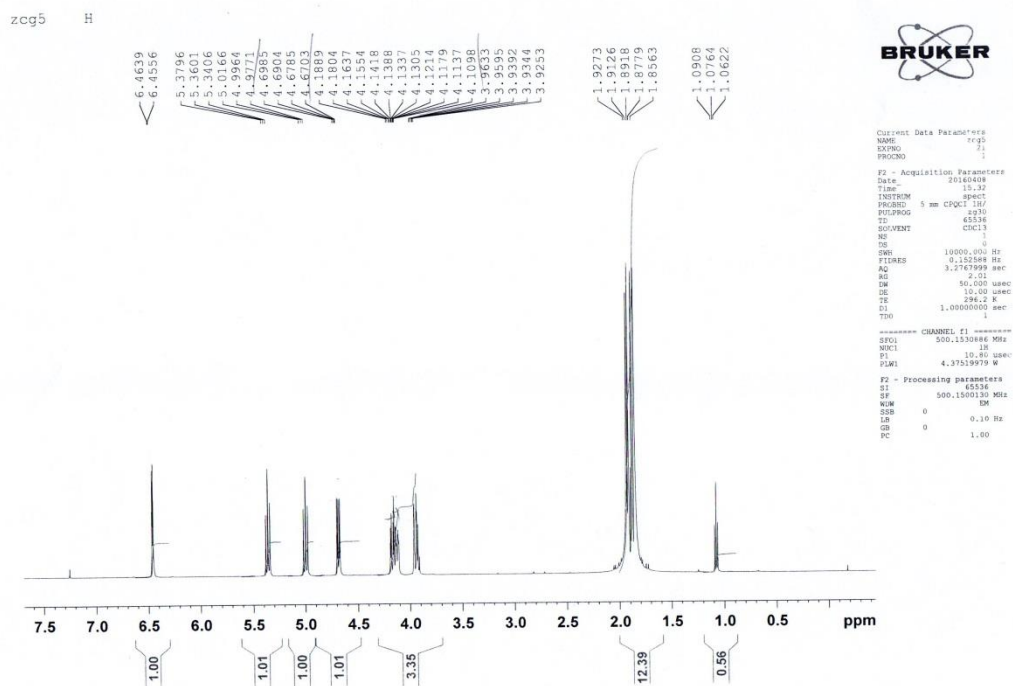

Figure S3.  $^{13}\text{C}$ -NMR spectra of compound **6**

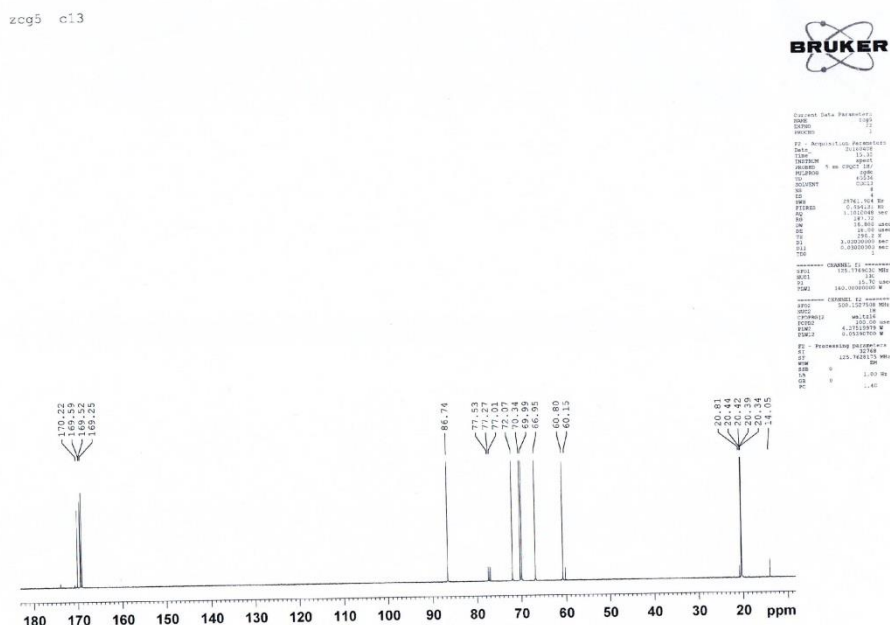

zcg25 H

ppm — 7.90932

| Peak (ppm) | Integration |
|------------|-------------|
| 7.90932    | 1.0000      |
| 7.31192    | 1.0452      |
| 6.46115    | 0.9304      |
| 6.25371    | 0.4618      |
| 5.21163    | 2.0137      |
| 5.19462    |             |
| 5.12657    |             |
| 5.10228    |             |
| 4.97475    |             |
| 4.91273    |             |
| 4.31139    | 0.6440      |
| 4.28550    |             |
| 4.27414    | 1.2664      |
| 4.05870    |             |
| 4.02802    |             |
| 3.85802    |             |
| 3.74628    |             |
| 3.30670    |             |
| 3.01462    |             |
| 3.00261    |             |
| 2.97071    |             |
| 2.96000    |             |
| 2.88932    | 1.3196      |
| 2.86770    |             |
| 2.25193    |             |
| 2.04533    |             |
| 1.93032    |             |
| 1.90932    |             |
| 1.98494    | 2.1114      |

Integrals

ppm 8 7 6 5 4 3 2

Current Data Parameters

NAME zcg25  
EXPNO 1  
PROCNO 1

F2 - Acquisition Parameters

Date\_ 20150203  
Time 15.55  
INSTRUM spect  
PROBHD 5 mm QNP 1H/15  
PULPROG zg  
TD 65536  
FIDRES 0.0000000 sec  
SOLVENT MeD  
NS 1  
DS 0  
SWH 7183.908 Hz  
FIDRES 0.106518 Hz  
AQ 4.5614252 sec  
RG 143  
DW 59.500 usec  
DE 6.00 usec  
TE 291.3 K  
Z1 1.00000000 sec  
MCHST 0.00000000 sec  
MCHW 0.01500000 sec

\*\*\*\*\* CHANNEL f1 \*\*\*\*\*

NUC1  
P1 13.50 usec  
PL1 -3.00 dB  
SFO1 400.1326090 MHz

F2 - Processing parameters

SI 32768  
SF 400.1300090 MHz  
WDW EM  
SSB 0  
LB 0.30 Hz  
GB 0  
PC 2.00

1D NMR plot parameters

CO 22.00 cm  
CY 12.00 cm  
F1P 8.327 ppm  
F1 331.70 Hz  
F2P 1.206 ppm  
F2 482.50 Hz  
NUC1 15N  
HSCN 129.56980 Hz/cm

c2 c13 and dept

13C NMR spectrum showing chemical shifts (ppm) and corresponding peak assignments:

| Chemical Shift (ppm) |
|----------------------|
| 172.46               |
| 171.77               |
| 171.27               |
| 166.83               |
| 157.61               |
| 157.64               |
| 157.16               |
| 151.66               |
| 146.71               |
| 137.26               |
| 133.74               |
| 132.72               |
| 128.16               |
| 110.07               |
| 106.68               |
| 102.71               |
| 99.22                |
| 96.43                |
| 93.83                |
| 78.42                |
| 74.06                |
| 73.77                |
| 72.44                |
| 70.42                |
| 69.72                |
| 62.89                |
| 59.21                |
| 58.77                |
| 49.77                |
| 49.00                |
| 48.56                |
| 48.49                |
| 26.78                |
| 20.19                |
| 20.54                |
| 20.32                |

```

=====
Experiment Data Parameters
NAME      jcp271
EXPNO     2
PROCNO    1
PR - Acquisiti
Date_     20110310
Time      11.45
INSTRUM   spect
PROBHD    5 mm 1
PULPROG   zgpg30
RG        613.6
SOLVENT   Me
NS         600
DS         4
SWH        24761.464 Hz
FIDRES     0.004411 Hz
AQ         1.1210348 sec
RG2         387.72
AQ2         14.810 sec
RG3         32.00 sec
RG4         3.0000000 sec
RG5         3.0000000 sec
RG6
RG7
RG8
===== CHANNEL f1 =====
NUC1       13
P1         120.0000000 MHz
NUC2
P2
===== CHANNEL f2 =====
NUC2       13
P2         120.0000000 MHz
===== CHANNEL f3 =====
NUC3       13
P3         120.0000000 MHz
===== CHANNEL f4 =====
NUC4       13
P4         120.0000000 MHz
===== CHANNEL f5 =====
NUC5       13
P5         120.0000000 MHz
===== CHANNEL f6 =====
NUC6       13
P6         120.0000000 MHz
===== CHANNEL f7 =====
NUC7       13
P7         120.0000000 MHz
===== CHANNEL f8 =====
NUC8       13
P8         120.0000000 MHz
===== CHANNEL f9 =====
NUC9       13
P9         120.0000000 MHz
===== CHANNEL f10 =====
NUC10      13
P10        120.0000000 MHz
===== CHANNEL f11 =====
NUC11      13
P11        120.0000000 MHz
===== CHANNEL f12 =====
NUC12      13
P12        120.0000000 MHz
===== CHANNEL f13 =====
NUC13      13
P13        120.0000000 MHz
===== CHANNEL f14 =====
NUC14      13
P14        120.0000000 MHz
===== CHANNEL f15 =====
NUC15      13
P15        120.0000000 MHz
===== CHANNEL f16 =====
NUC16      13
P16        120.0000000 MHz
===== CHANNEL f17 =====
NUC17      13
P17        120.0000000 MHz
===== CHANNEL f18 =====
NUC18      13
P18        120.0000000 MHz
===== CHANNEL f19 =====
NUC19      13
P19        120.0000000 MHz
===== CHANNEL f20 =====
NUC20      13
P20        120.0000000 MHz
===== CHANNEL f21 =====
NUC21      13
P21        120.0000000 MHz
===== CHANNEL f22 =====
NUC22      13
P22        120.0000000 MHz
===== CHANNEL f23 =====
NUC23      13
P23        120.0000000 MHz
===== CHANNEL f24 =====
NUC24      13
P24        120.0000000 MHz
===== CHANNEL f25 =====
NUC25      13
P25        120.0000000 MHz
===== CHANNEL f26 =====
NUC26      13
P26        120.0000000 MHz
===== CHANNEL f27 =====
NUC27      13
P27        120.0000000 MHz
===== CHANNEL f28 =====
NUC28      13
P28        120.0000000 MHz
===== CHANNEL f29 =====
NUC29      13
P29        120.0000000 MHz
===== CHANNEL f30 =====
NUC30      13
P30        120.0000000 MHz
===== CHANNEL f31 =====
NUC31      13
P31        120.0000000 MHz
===== CHANNEL f32 =====
NUC32      13
P32        120.0000000 MHz
===== CHANNEL f33 =====
NUC33      13
P33        120.0000000 MHz
===== CHANNEL f34 =====
NUC34      13
P34        120.0000000 MHz
===== CHANNEL f35 =====
NUC35      13
P35        120.0000000 MHz
===== CHANNEL f36 =====
NUC36      13
P36        120.0000000 MHz
===== CHANNEL f37 =====
NUC37      13
P37        120.0000000 MHz
===== CHANNEL f38 =====
NUC38      13
P38        120.0000000 MHz
===== CHANNEL f39 =====
NUC39      13
P39        120.0000000 MHz
===== CHANNEL f40 =====
NUC40      13
P40        120.0000000 MHz
===== CHANNEL f41 =====
NUC41      13
P41        120.0000000 MHz
===== CHANNEL f42 =====
NUC42      13
P42        120.0000000 MHz
===== CHANNEL f43 =====
NUC43      13
P43        120.0000000 MHz
===== CHANNEL f44 =====
NUC44      13
P44        120.0000000 MHz
===== CHANNEL f45 =====
NUC45      13
P45        120.0000000 MHz
===== CHANNEL f46 =====
NUC46      13
P46        120.0000000 MHz
===== CHANNEL f47 =====
NUC47      13
P47        120.0000000 MHz
===== CHANNEL f48 =====
NUC48      13
P48        120.0000000 MHz
===== CHANNEL f49 =====
NUC49      13
P49        120.0000000 MHz
===== CHANNEL f50 =====
NUC50      13
P50        120.0000000 MHz
===== CHANNEL f51 =====
NUC51      13
P51        120.0000000 MHz
===== CHANNEL f52 =====
NUC52      13
P52        120.0000000 MHz
===== CHANNEL f53 =====
NUC53      13
P53        120.0000000 MHz
===== CHANNEL f54 =====
NUC54      13
P54        120.0000000 MHz
===== CHANNEL f55 =====
NUC55      13
P55        120.0000000 MHz
===== CHANNEL f56 =====
NUC56      13
P56        120.0000000 MHz
===== CHANNEL f57 =====
NUC57      13
P57        120.0000000 MHz
===== CHANNEL f58 =====
NUC58      13
P58        120.0000000 MHz
===== CHANNEL f59 =====
NUC59      13
P59        120.0000000 MHz
===== CHANNEL f60 =====
NUC60      13
P60        120.0000000 MHz
===== CHANNEL f61 =====
NUC61      13
P61        120.0000000 MHz
===== CHANNEL f62 =====
NUC62      13
P62        120.0000000 MHz
===== CHANNEL f63 =====
NUC63      13
P63        120.0000000 MHz
===== CHANNEL f64 =====
NUC64      13
P64        120.0000000 MHz
===== CHANNEL f65 =====
NUC65      13
P65        120.0000000 MHz
===== CHANNEL f66 =====
NUC66      13
P66        120.0000000 MHz
===== CHANNEL f67 =====
NUC67      13
P67        120.0000000 MHz
===== CHANNEL f68 =====
NUC68      13
P68        120.0000000 MHz
===== CHANNEL f69 =====
NUC69      13
P69        120.0000000 MHz
===== CHANNEL f70 =====
NUC70      13
P70        120.0000000 MHz
===== CHANNEL f71 =====
NUC71      13
P71        120.0000000 MHz
===== CHANNEL f72 =====
NUC72      13
P72        120.0000000 MHz
===== CHANNEL f73 =====
NUC73      13
P73        120.0000000 MHz
===== CHANNEL f74 =====
NUC74      13
P74        120.0000000 MHz
===== CHANNEL f75 =====
NUC75      13
P75        120.0000000 MHz
===== CHANNEL f76 =====
NUC76      13
P76        120.0000000 MHz
===== CHANNEL f77 =====
NUC77      13
P77        120.0000000 MHz
===== CHANNEL f78 =====
NUC78      13
P78        120.0000000 MHz
===== CHANNEL f79 =====
NUC79      13
P79        120.0000000 MHz
===== CHANNEL f80 =====
NUC80      13
P80        120.0000000 MHz
===== CHANNEL f81 =====
NUC81      13
P81        120.0000000 MHz
===== CHANNEL f82 =====
NUC82      13
P82        120.0000000 MHz
===== CHANNEL f83 =====
NUC83      13
P83        120.0000000 MHz
===== CHANNEL f84 =====
NUC84      13
P84        120.0000000 MHz
===== CHANNEL f85 =====
NUC85      13
P85        120.0000000 MHz
===== CHANNEL f86 =====
NUC86      13
P86        120.0000000 MHz
===== CHANNEL f87 =====
NUC87      13
P87        120.0000000 MHz
===== CHANNEL f88 =====
NUC88      13
P88        120.0000000 MHz
===== CHANNEL f89 =====
NUC89      13
P89        120.0000000 MHz
===== CHANNEL f90 =====
NUC90      13
P90        12
```

Figure S6. HMBC spectra of compound 7

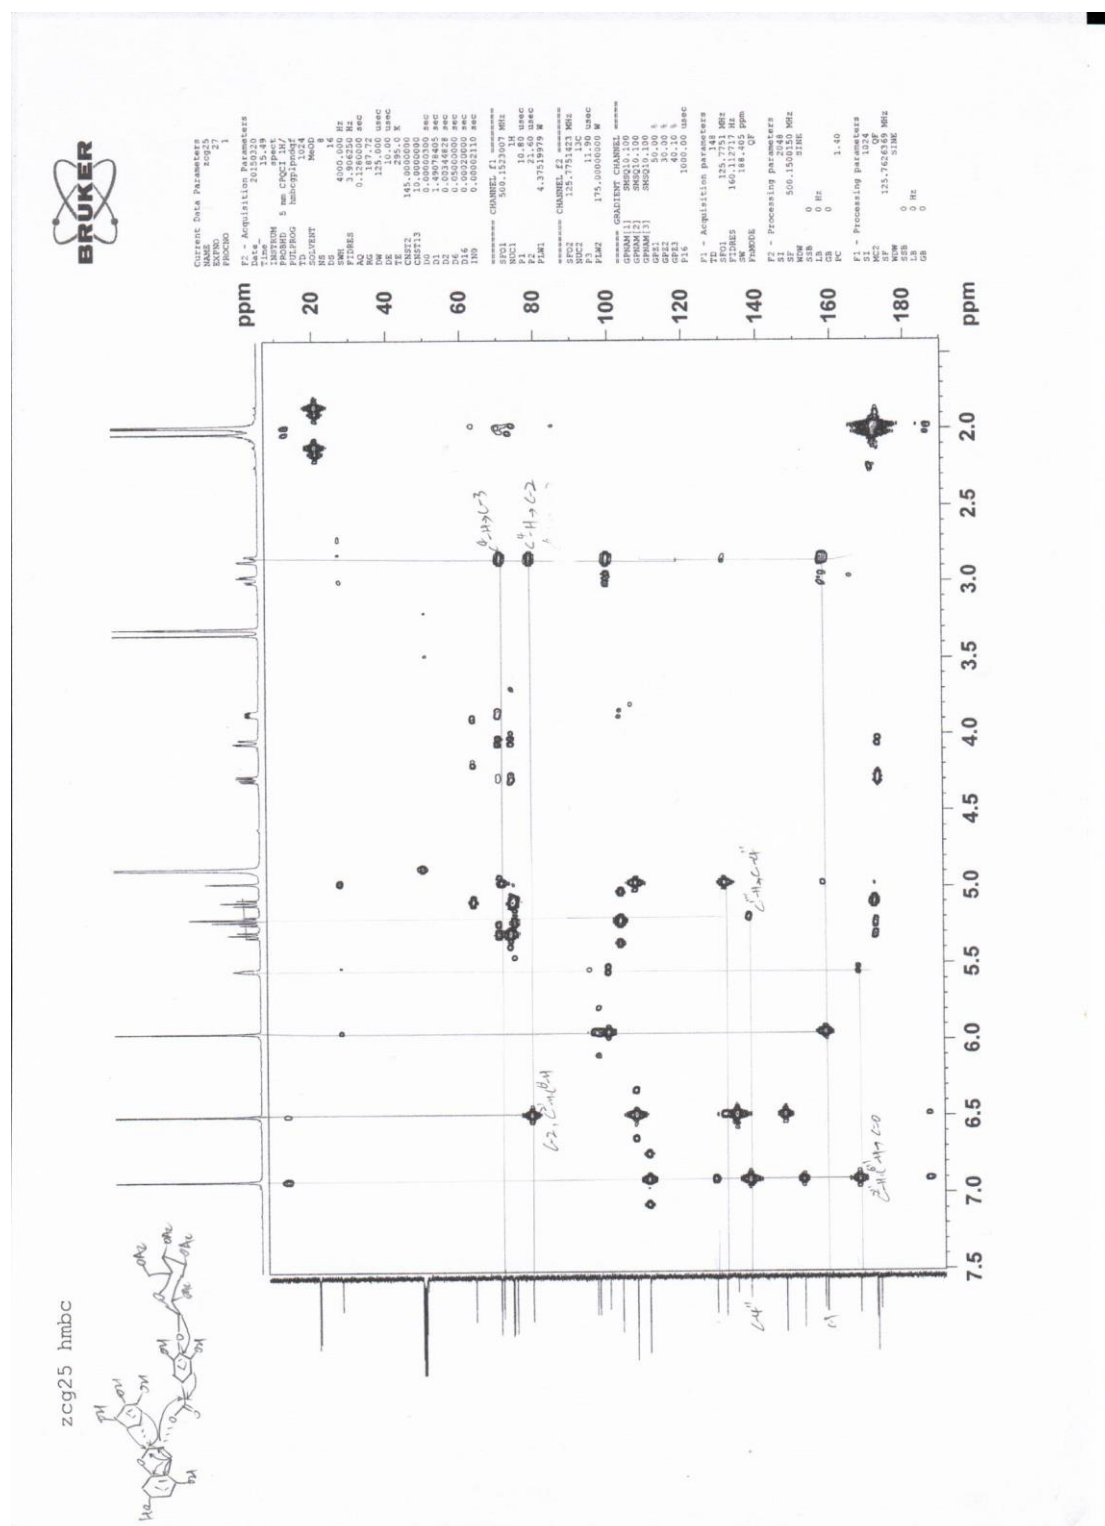

Figure S7.  $^1\text{H}$ -NMR spectra of compound **8**

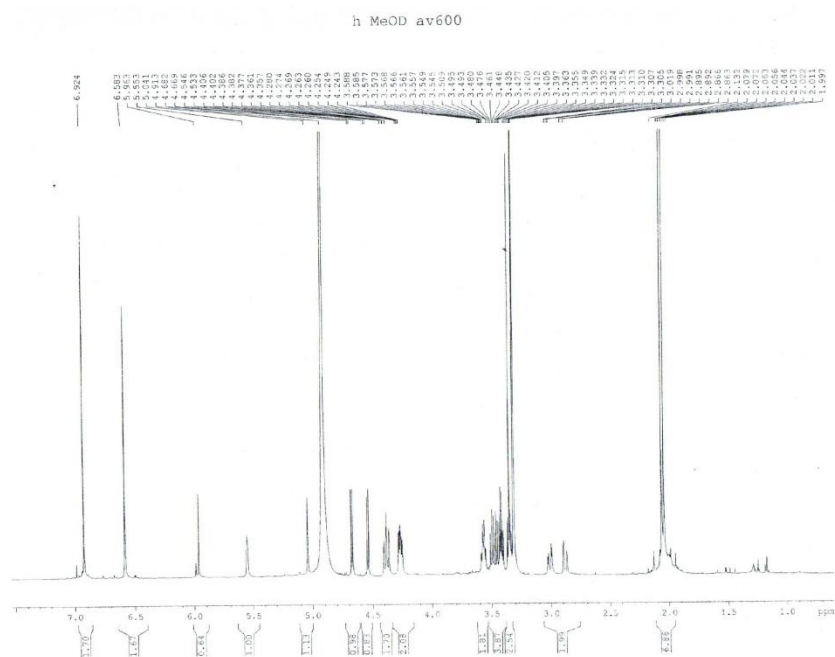

Figure S8.  $^{13}\text{C}$ -NMR spectra of compound **8**

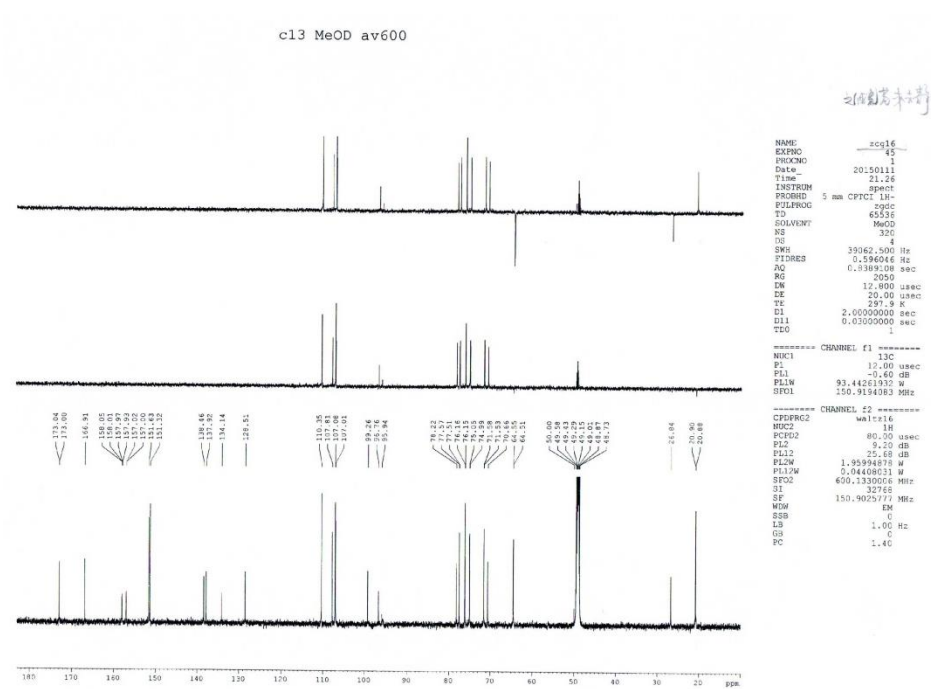

Figure S9. HMBC spectra of compound **8**

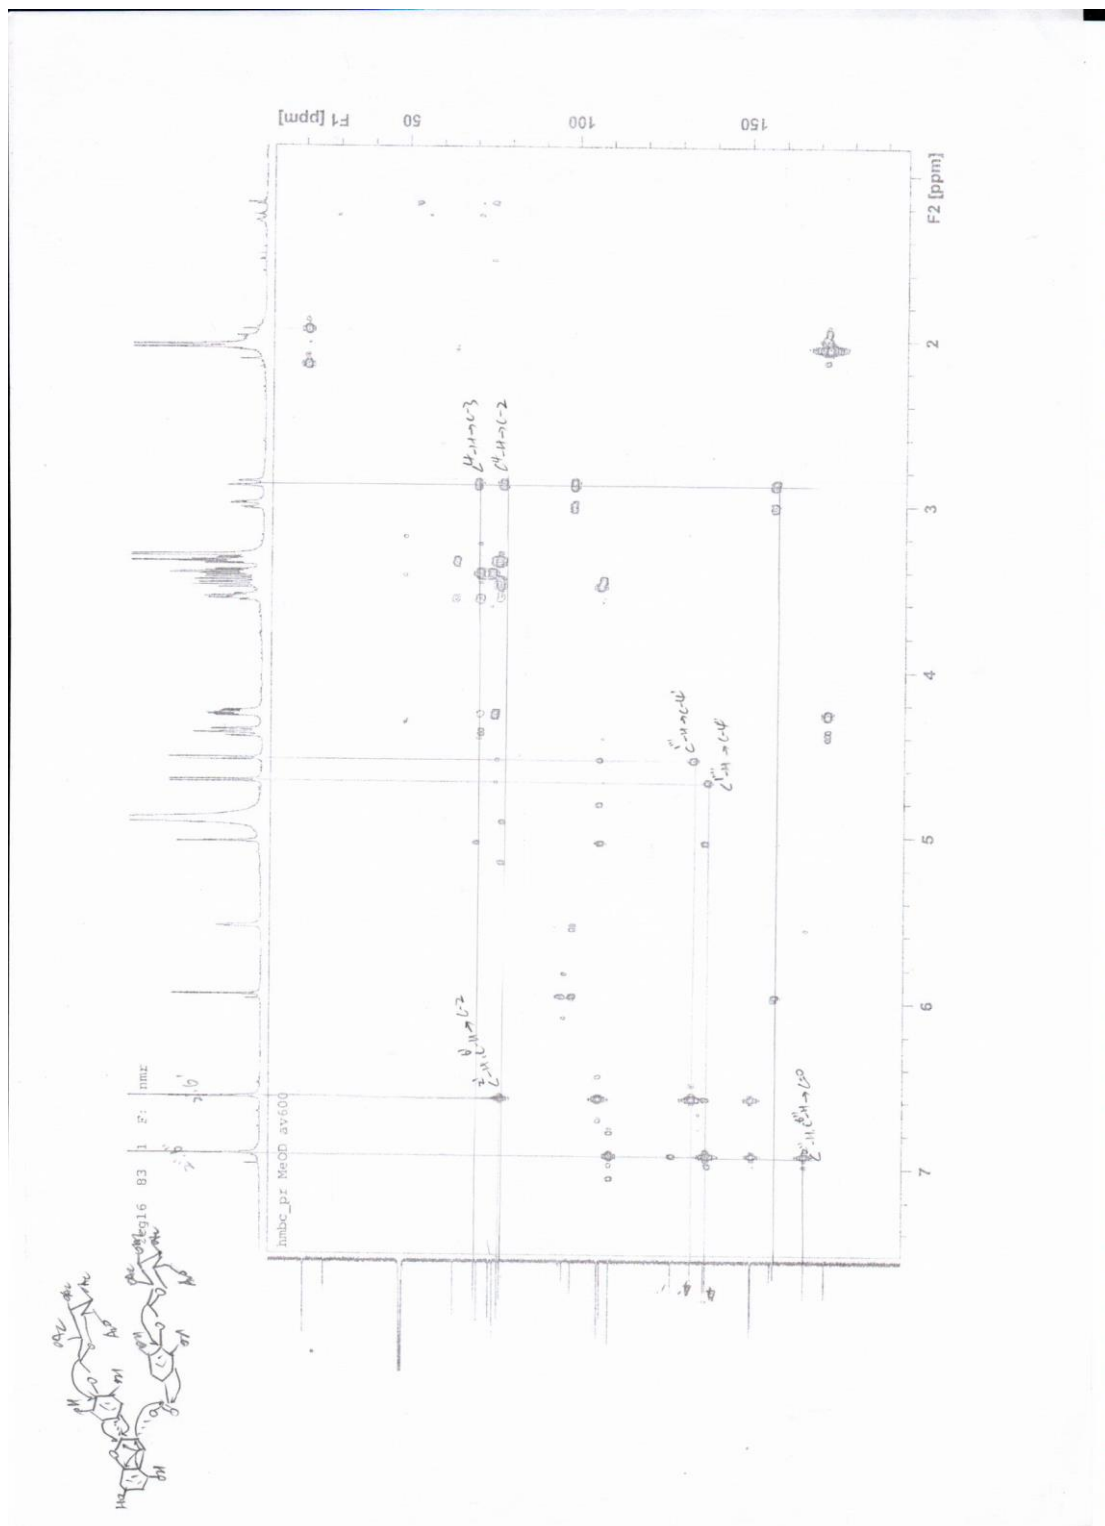

Figure S10.  $^1\text{H}$ -NMR spectra of compound **9**

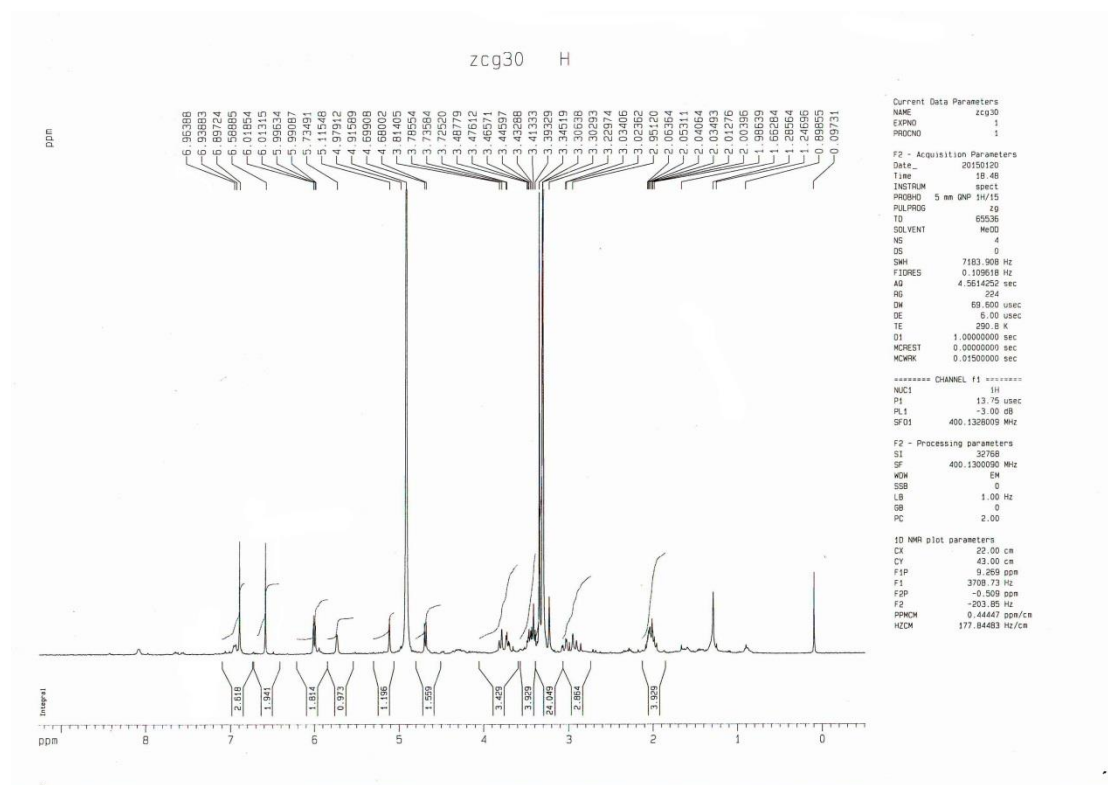

Figure S11.  $^{13}\text{C}$ -NMR spectra of compound **9**

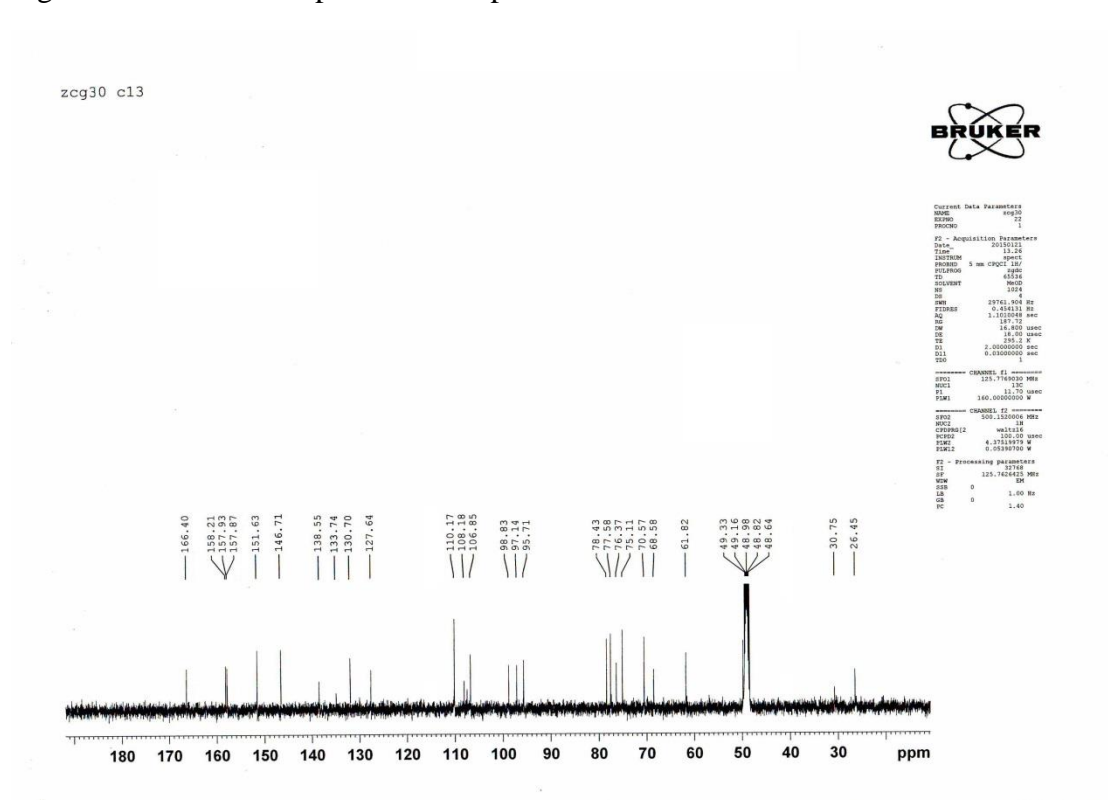

Figure S12.  $^1\text{H}$ -NMR spectra of compound **10**

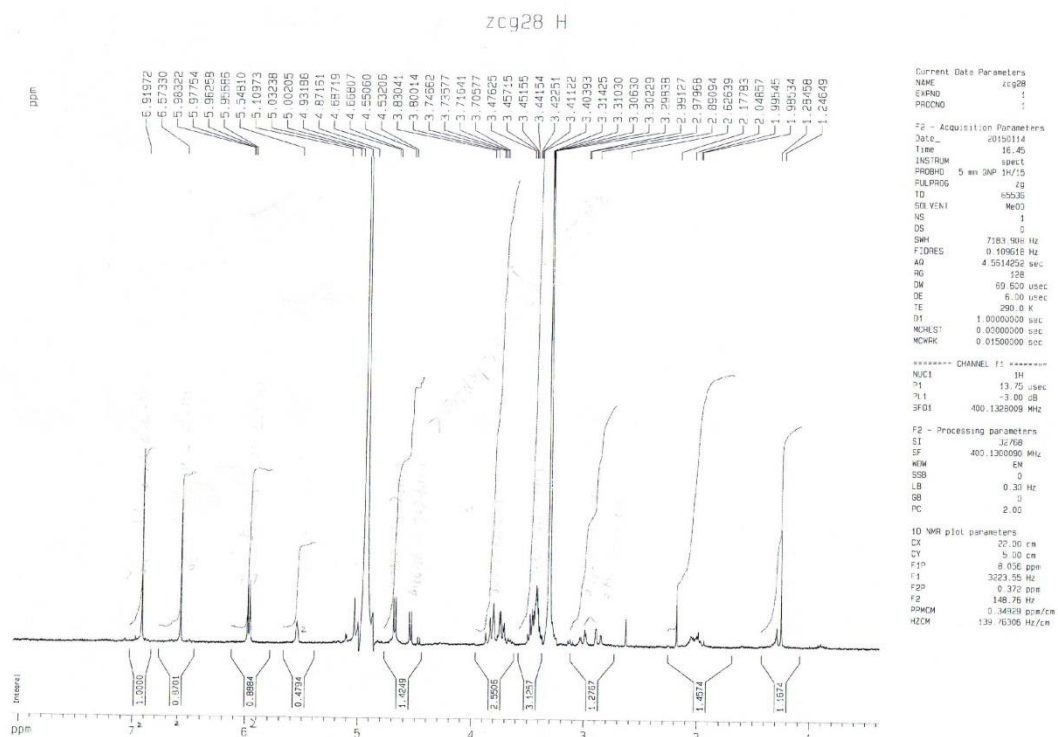

Figure S13.  $^{13}\text{C}$ -NMR spectra of compound **10**

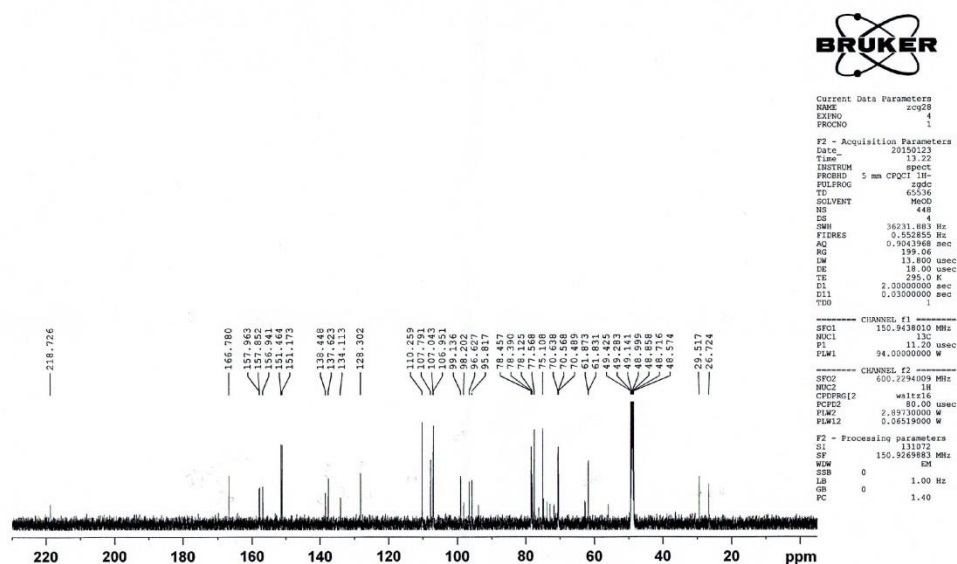

Figure S14.  $^1\text{H}$ -NMR spectra of compound **11**

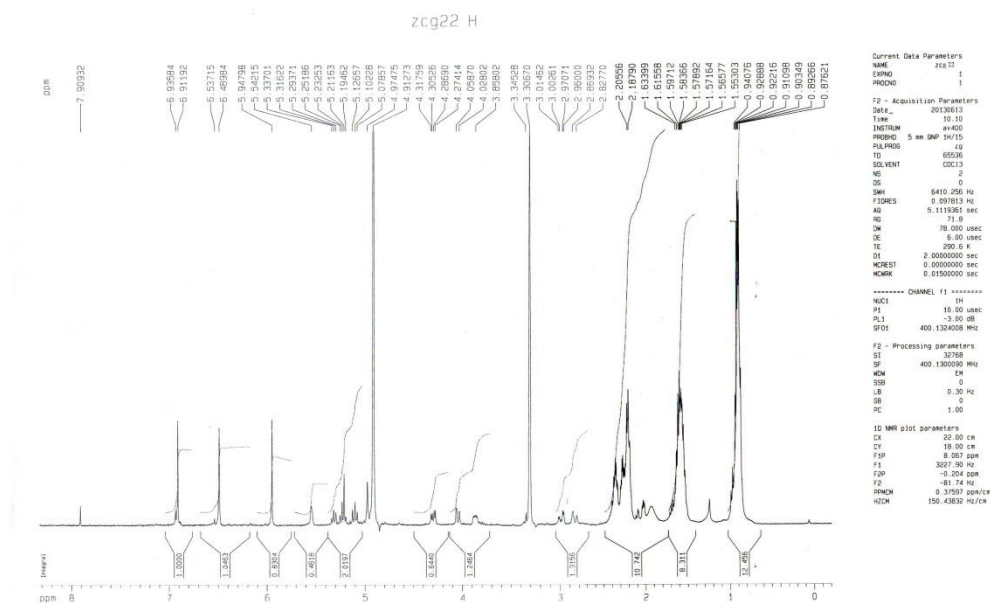

Figure S15.  $^{13}\text{C}$ -NMR spectra of compound **11**

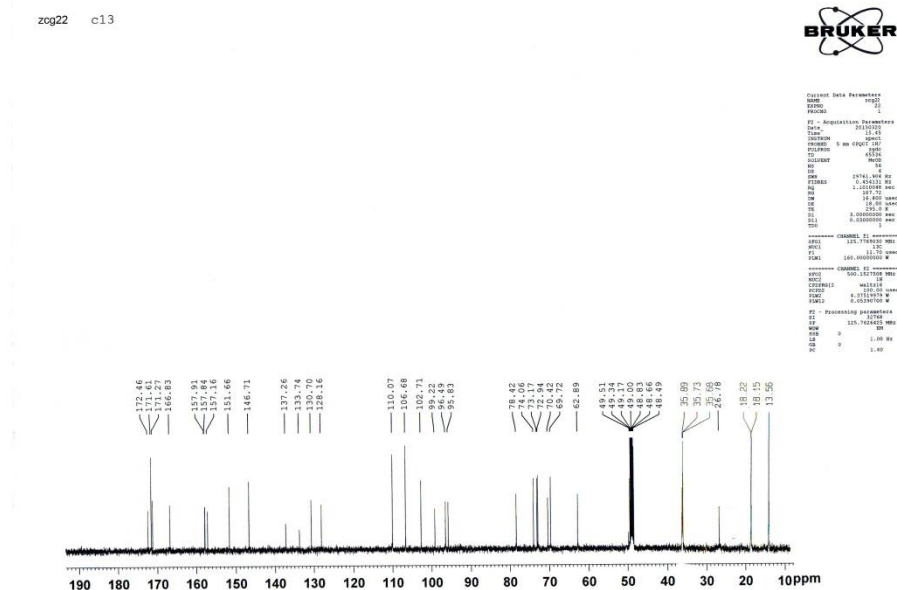

[illegible]

zcg26 c13 MeOD av600
